# Supplementary material for: A Review of a Decade of Local Projects, Studies and Initiatives of Atypical Influxes of Pelagic Sargassum on Mexican Caribbean Coasts
Source: MDPI journal article supplement (doi:10.3390/phycology2030014), 2022-06-30
Supplement: s1 [file s1]

| Field                                   | Classifications                                                                                                                                                                                                                                                                   | Description                                                                                                                                                                                                                                                                                                                                                                                                                                                                                                                                                        |
|-----------------------------------------|-----------------------------------------------------------------------------------------------------------------------------------------------------------------------------------------------------------------------------------------------------------------------------------|--------------------------------------------------------------------------------------------------------------------------------------------------------------------------------------------------------------------------------------------------------------------------------------------------------------------------------------------------------------------------------------------------------------------------------------------------------------------------------------------------------------------------------------------------------------------|
| N° of projects                          |                                                                                                                                                                                                                                                                                   | Number of projects (from the projects database) in which the stakeholder participates                                                                                                                                                                                                                                                                                                                                                                                                                                                                              |
| ID                                      | 100 to 2030 (10-in-10 intervals)                                                                                                                                                                                                                                                  | Unique identification number from the projects database                                                                                                                                                                                                                                                                                                                                                                                                                                                                                                            |
| Search by surname                       | NA                                                                                                                                                                                                                                                                                | Stakeholder's last name for a more efficient search                                                                                                                                                                                                                                                                                                                                                                                                                                                                                                                |
| Full name                               | NA                                                                                                                                                                                                                                                                                | Stakeholder's full name                                                                                                                                                                                                                                                                                                                                                                                                                                                                                                                                            |
| Strategic line of the CONACYT Agenda    | Origin and ecological importance; Monitoring, modeling and early warning; Socio-economic and environmental impacts; Containment, harvest, and disposal; Potential uses; Restoration; Regulations; Communication and education; International cooperation; Comprehensive attention | The stakeholder is assigned to one of the nine strategic and multidisciplinary lines of the CONACYT Agenda ( <a href="https://conacyt.mx/sargazo/images/Agenda/2020/Agenda_Conacyt_Sargazo-2020_.pdf">https://conacyt.mx/sargazo/images/Agenda/2020/Agenda_Conacyt_Sargazo-2020_.pdf</a> ). If the stakeholder works with more than one line, the stakeholder gets classified in a new line called "Comprehensive attention". It is important to note that within the government sector, only institutions or working group leaders were included in the database. |
| Title                                   | NA                                                                                                                                                                                                                                                                                | Function or title of the stakeholder in his company, organization, university, etc.                                                                                                                                                                                                                                                                                                                                                                                                                                                                                |
| Field of expertise or lines of research | NA                                                                                                                                                                                                                                                                                | Stakeholder's main field of study                                                                                                                                                                                                                                                                                                                                                                                                                                                                                                                                  |
| Institution                             | NA                                                                                                                                                                                                                                                                                | Name of the institution, organization, etc., of affiliation                                                                                                                                                                                                                                                                                                                                                                                                                                                                                                        |
| Location                                | NA                                                                                                                                                                                                                                                                                | City and state in which the institution is located                                                                                                                                                                                                                                                                                                                                                                                                                                                                                                                 |

|           |                                                                                                 |                                                                                                                                                                                                                                                                                                                                                                                                                                                                                                                                                                            |
|-----------|-------------------------------------------------------------------------------------------------|----------------------------------------------------------------------------------------------------------------------------------------------------------------------------------------------------------------------------------------------------------------------------------------------------------------------------------------------------------------------------------------------------------------------------------------------------------------------------------------------------------------------------------------------------------------------------|
| Sector    | Government sector;<br>Dependencies abroad;<br>Academic sector; Private<br>sector; Civil society | Government sector: includes<br>agencies at the municipal, state,<br>and federal levels; Dependencies<br>Abroad: Institutions or<br>organizations headquartered<br>outside of Mexico that conduct<br>research or carry out initiatives on<br>the Mexican coasts; Academic<br>sector: includes public and private<br>universities, research centers,<br>institutes, research consortia, etc.;<br>Private sector: includes companies,<br>hotels, banks, etc.; Civil society:<br>includes NGOs, external<br>consultants, civil associations, non-<br>profit associations, etc. |
| Subsector | NA                                                                                              | Excluding the academic sector,<br>some sub-sectors are specified. For<br>example, in the case of<br>government sector, the municipal,<br>state and federal levels are<br>identified as subsectors                                                                                                                                                                                                                                                                                                                                                                          |
