# Supplementary material for: A Review of a Decade of Local Projects, Studies and Initiatives of Atypical Influxes of Pelagic Sargassum on Mexican Caribbean Coasts
Source: MDPI journal article supplement (doi:10.3390/phycology2030014), 2022-06-30
Supplement: s1 [file s1]

| Field                      | Classifications                                                                                                                                                                                                                                                                                | Description                                                                                                                                                                                                                                                                                                                                                                                                                                                                                                                                                                                                                                                                                                                                                                                                                                                                                                                                                                                                                                                                                                                 |
|----------------------------|------------------------------------------------------------------------------------------------------------------------------------------------------------------------------------------------------------------------------------------------------------------------------------------------|-----------------------------------------------------------------------------------------------------------------------------------------------------------------------------------------------------------------------------------------------------------------------------------------------------------------------------------------------------------------------------------------------------------------------------------------------------------------------------------------------------------------------------------------------------------------------------------------------------------------------------------------------------------------------------------------------------------------------------------------------------------------------------------------------------------------------------------------------------------------------------------------------------------------------------------------------------------------------------------------------------------------------------------------------------------------------------------------------------------------------------|
| ID                         | 100 to 2030 (10-in-10 intervals)                                                                                                                                                                                                                                                               | Unique identification number for each project                                                                                                                                                                                                                                                                                                                                                                                                                                                                                                                                                                                                                                                                                                                                                                                                                                                                                                                                                                                                                                                                               |
| Type of consulted document | Mobile Applications (Apps); Peer reviewed divulgation articles; Peer reviewed scientific articles; Articles or presentations at scientific meetings or congresses; Description of funded projects; e-books/Gazettes/Newsletters; Media news (on projects); Websites; Technical reports; Theses | Apps: Applications for mobile phones; Peer reviewed divulgation articles: Articles addressing the current state of understanding of a topic or articles ensuring dissemination on a topic to a general public; Peer-reviewed scientific articles: Published scientific articles where the results of a research are communicated; Articles or presentations at scientific meetings or congresses: Congress reports, conference agendas, articles published in journals or compendiums of congresses, meeting abstracts; Description of funded projects: Institutional projects that were financed throughout the public or private sector; e-books/Gazettes/Newsletters: Documents without peer-review process published from an institution or organization; Media news (on projects): Notes in the media (websites, newspapers, magazines, radio, etc.) related to a past or ongoing project; Web pages: online sites of NGOs, businesses, government agencies, etc.; Technical Reports: Documents without peer review that describe the process and/or results of a project; Thesis: Undergrad or graduate level thesis. |
| Project name               | NA                                                                                                                                                                                                                                                                                             | Name of the project or initiative                                                                                                                                                                                                                                                                                                                                                                                                                                                                                                                                                                                                                                                                                                                                                                                                                                                                                                                                                                                                                                                                                           |

|                                                                      |                                                                                        |                                                                                                                                                                                                                                                                                                                                                                                                                                                                                                                              |
|----------------------------------------------------------------------|----------------------------------------------------------------------------------------|------------------------------------------------------------------------------------------------------------------------------------------------------------------------------------------------------------------------------------------------------------------------------------------------------------------------------------------------------------------------------------------------------------------------------------------------------------------------------------------------------------------------------|
| Name of investigators or leads and main collaborators of the project | NA                                                                                     | PI or leads and collaborators of the project or initiative                                                                                                                                                                                                                                                                                                                                                                                                                                                                   |
| N° of participants                                                   | NA                                                                                     | Total number of PI, leads and collaborators of the project or initiative                                                                                                                                                                                                                                                                                                                                                                                                                                                     |
| Sector                                                               | Government sector; Dependencies abroad; Academic sector; Private sector; Civil society | Government sector: includes agencies at the municipal, state, and federal levels; Dependencies Abroad: Institutions or organizations headquartered outside of Mexico that conduct research or carry out initiatives on the Mexican coasts; Academic sector: includes public and private universities, research centers, institutes, research consortia, etc.; Private sector: includes companies, hotels, banks, etc.; Civil society: includes NGOs, external consultants, civil associations, non-profit associations, etc. |
| Institution                                                          | NA                                                                                     | Name of the institution or organization responsible for the project or initiative                                                                                                                                                                                                                                                                                                                                                                                                                                            |
| Project description                                                  | NA                                                                                     | Short description of the project or initiative                                                                                                                                                                                                                                                                                                                                                                                                                                                                               |
| Start date                                                           | 2010-2021                                                                              | Start date of the project or initiative. If it is not specified, and in applicable cases, it is taken as the year in which field work activities (surveys, harvest, etc.) started                                                                                                                                                                                                                                                                                                                                            |
| End date                                                             | 2010- To date                                                                          | If not specified, and in applicable cases, the year of project completion is taken as the date of publication                                                                                                                                                                                                                                                                                                                                                                                                                |

|                                                   |                                                                                                                                                                                                                                                          |                                                                                                                                                                                                                                                                                                         |
|---------------------------------------------------|----------------------------------------------------------------------------------------------------------------------------------------------------------------------------------------------------------------------------------------------------------|---------------------------------------------------------------------------------------------------------------------------------------------------------------------------------------------------------------------------------------------------------------------------------------------------------|
| Estimated project duration (years)                | Minimum 1 year, maximum is variable                                                                                                                                                                                                                      | Total duration in years of a project, from its inception to its completion. If this period is not specified, the "start date" and "end date" fields are used to estimate it                                                                                                                             |
| Estimated date of publication/delivery of results | 2010-2021                                                                                                                                                                                                                                                | Estimated date of publication or presentation of results (the most recent one is considered). This date is used to assign a specific year to each project for subsequent analysis.                                                                                                                      |
| Study site                                        | NA                                                                                                                                                                                                                                                       | State, municipality, town or beach defined as study site                                                                                                                                                                                                                                                |
| Strategic line of the CONACYT Agenda              | Origin and ecological importance; Monitoring, modeling and early warning; Socio-economic and environmental impacts; Containment, harvest, and disposal; Potential uses; Restoration; Regulations; Communication and education; International cooperation | The projects or initiatives are assigned to one of the nine strategic and multidisciplinary lines of the CONACYT Agenda ( <a href="https://conacyt.mx/sargazo/images/Agenda/2020/Agenda_Conacyt_Sargazo-2020_.pdf">https://conacyt.mx/sargazo/images/Agenda/2020/Agenda_Conacyt_Sargazo-2020_.pdf</a> ) |
| Objectives                                        | NA                                                                                                                                                                                                                                                       | Project or initiative objectives that are described or that can be inferred based on the content of the document                                                                                                                                                                                        |
| Main results and conclusions                      | NA                                                                                                                                                                                                                                                       | Short description of the most relevant results of the project or initiative                                                                                                                                                                                                                             |
| Publications and available databases              | NA                                                                                                                                                                                                                                                       | Bibliographic references and databases (i.e., websites) where information can be found and/or downloaded                                                                                                                                                                                                |

|                                    |    |                                                                                                                                                                                                                                                                                                                                                                                                                                                                                                                                                                                                                            |
|------------------------------------|----|----------------------------------------------------------------------------------------------------------------------------------------------------------------------------------------------------------------------------------------------------------------------------------------------------------------------------------------------------------------------------------------------------------------------------------------------------------------------------------------------------------------------------------------------------------------------------------------------------------------------------|
| Institutional collaborations       | NA | All those institutions and organizations that collaborated in a project or initiative. Outside the academic sector, it is specified if the collaboration comes from another sector (government, dependencies abroad, civil society or private sector). If the collaborations are not specified in the document, the co-authors or collaborators affiliation's organization is considered as the collaborating institution. In addition to this affiliation, in applicable cases, the acknowledgments section is reviewed to extract other possible collaborations that directly influenced the development of the project. |
| N° collaborations per project      | NA | Total number of collaborations identified for a project or initiative                                                                                                                                                                                                                                                                                                                                                                                                                                                                                                                                                      |
| N° of national collaborations      | NA | Total number of national (i.e., Mexico) collaborations identified in a project or initiative                                                                                                                                                                                                                                                                                                                                                                                                                                                                                                                               |
| N° of international collaborations | NA | Number of international (i.e., not Mexico) collaborations identified in a project or initiative                                                                                                                                                                                                                                                                                                                                                                                                                                                                                                                            |
| General comments                   | NA | Other web pages or additional links to related documents of the project or initiative                                                                                                                                                                                                                                                                                                                                                                                                                                                                                                                                      |

|            |                             |                                                               |
|------------|-----------------------------|---------------------------------------------------------------|
| Funds (\$) | NA                          | Total amount (\$) awarded to a project or initiative          |
| Patents    | Minimum 0, variable maximum | Total number of patents either in process or already granted. |
